# Supplementary material for: In Vivo Tracking of Human Hematopoiesis Reveals Patterns of Clonal Dynamics during Early and Steady-State Reconstitution Phases
Source: PubMed Central journal article supplement — Cell Stem Cell. 2016 Jul 7;19(1):107–19. doi: 10.1016/j.stem.2016.04.016 (PMC4942697; doi:10.1016/j.stem.2016.04.016), 2016-07-07
Supplement: mmc1.pdf [file mmc1.pdf]

## Supplemental Information

### **In Vivo Tracking of Human Hematopoiesis Reveals Patterns of Clonal Dynamics during Early and Steady-State Reconstitution Phases**

**Luca Biasco, Danilo Pellin, Serena Scala, Francesca Dionisio, Luca Basso-Ricci, Lorena Leonardelli, Samantha Scaramuzza, Cristina Baricordi, Francesca Ferrua, Maria Pia Cicalese, Stefania Giannelli, Victor Neduva, David J. Dow, Manfred Schmidt, Christof Von Kalle, Maria Grazia Roncarolo, Fabio Ciceri, Paola Vicard, Ernst Wit, Clelia Di Serio, Luigi Naldini, and Alessandro Aiuti**

Figure S1

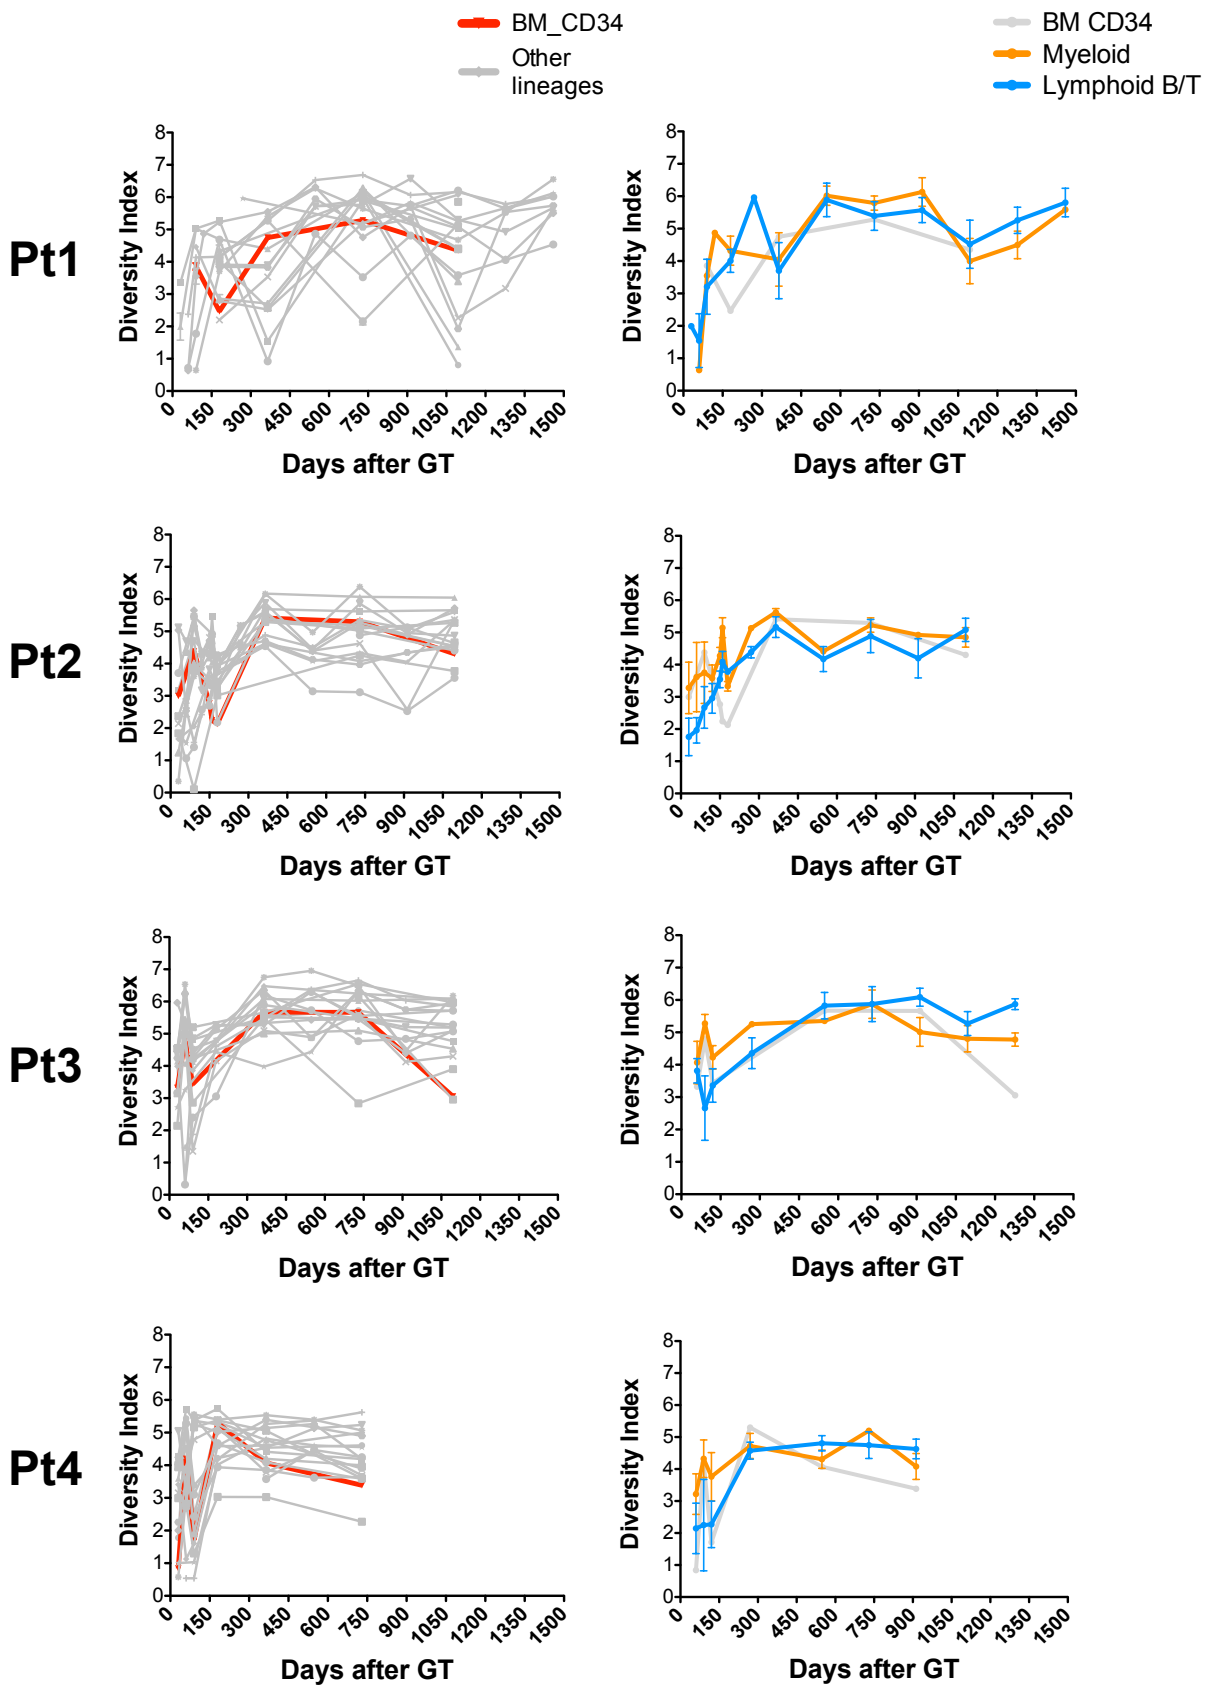

Figure S2

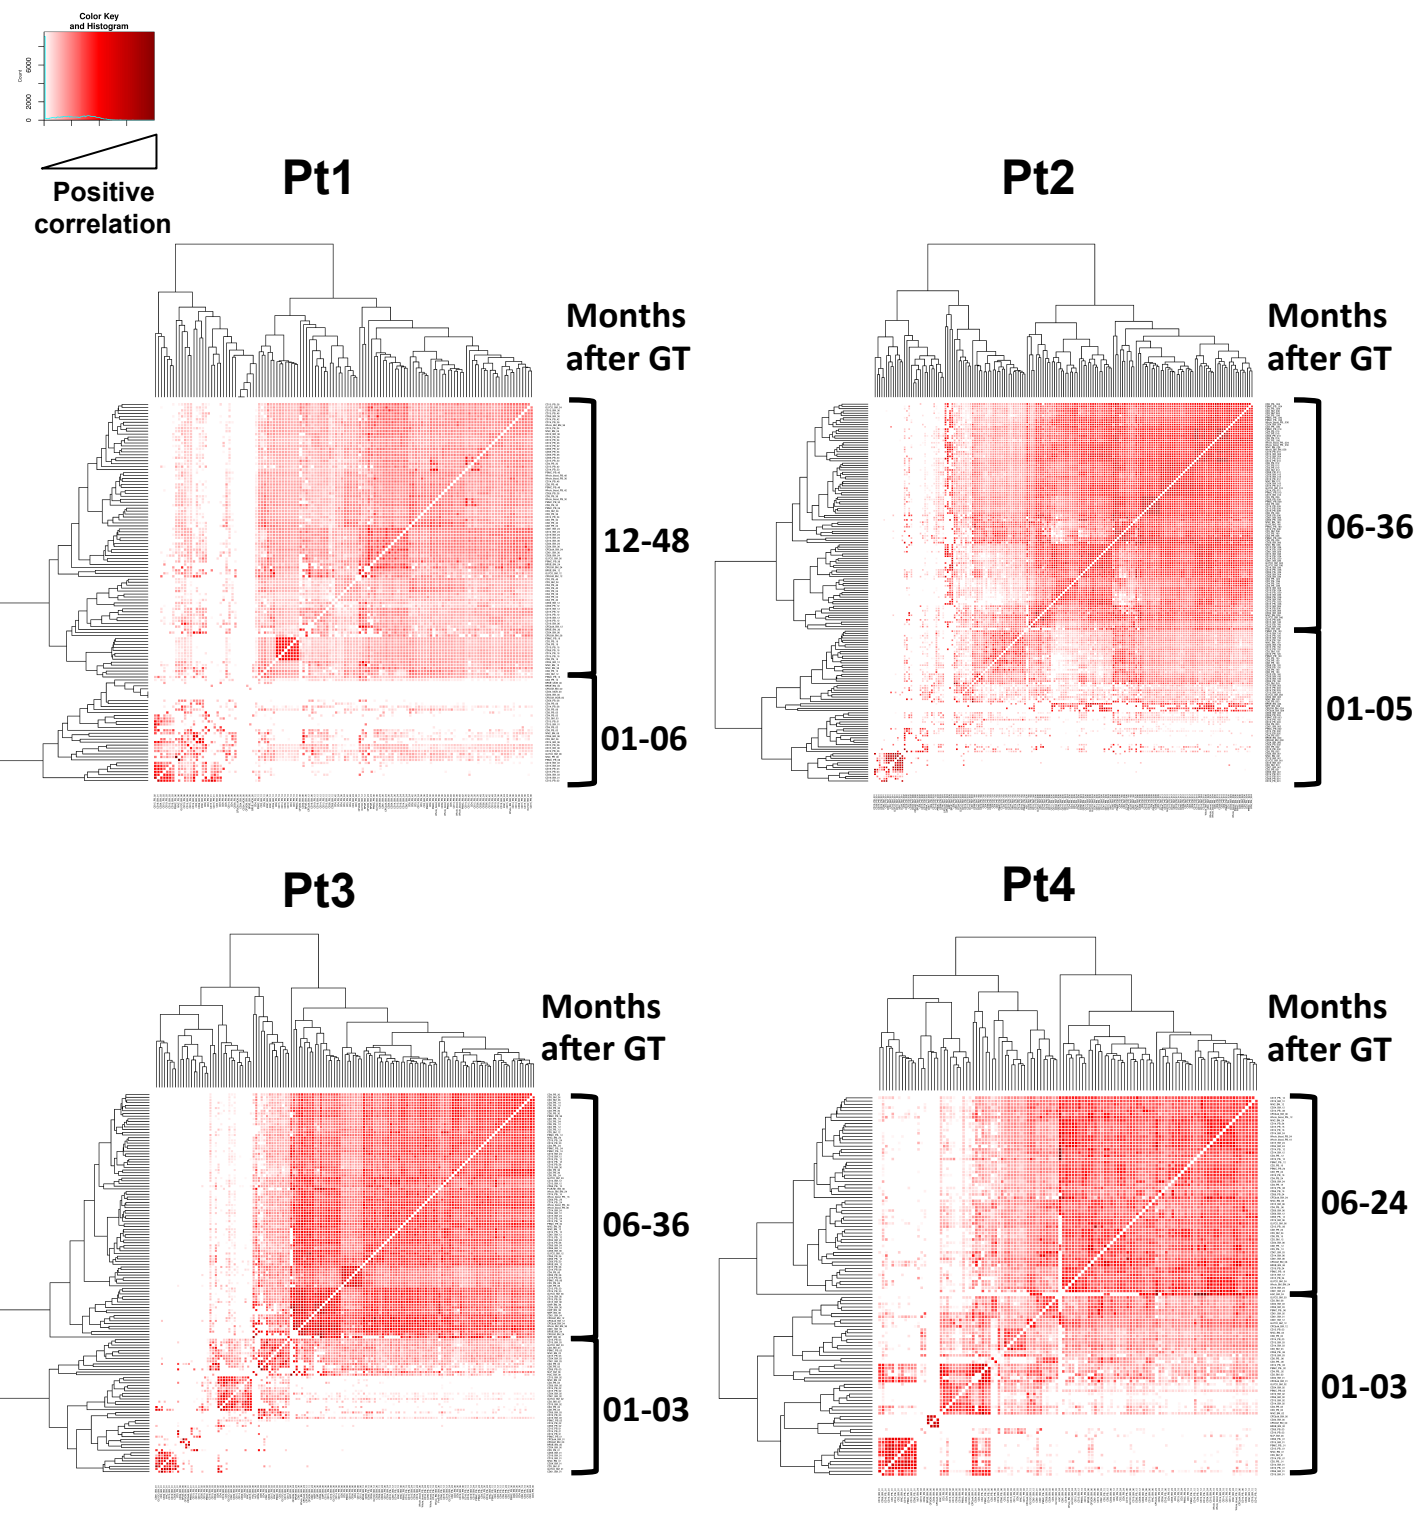

Figure S3

|             |       |       |       |       |
|-------------|-------|-------|-------|-------|
| Numb. of IS | 878   | 1573  | 819   | 1160  |
| Seq. reads  | 78613 | 39058 | 93477 | 92661 |

Pt1

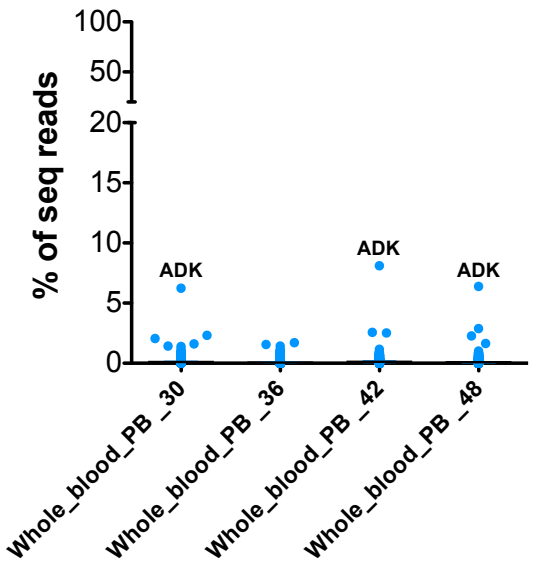

|             |       |       |       |
|-------------|-------|-------|-------|
| Numb. of IS | 587   | 855   | 617   |
| Seq. reads  | 14368 | 73228 | 78597 |

Pt2

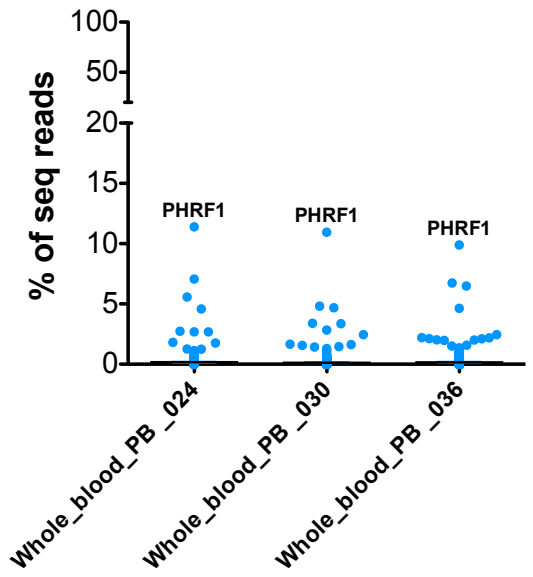

|             |        |       |       |
|-------------|--------|-------|-------|
| Numb. of IS | 1587   | 674   | 818   |
| Seq. reads  | 111513 | 74697 | 45448 |

Pt3

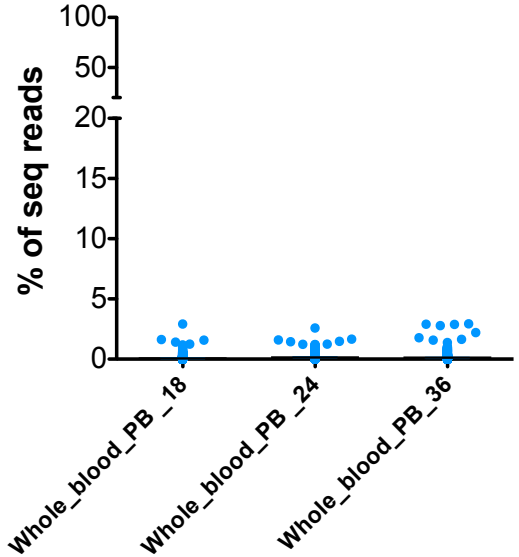

|             |       |       |       |
|-------------|-------|-------|-------|
| Numb. of IS | 205   | 596   | 172   |
| Seq. reads  | 65680 | 58711 | 52179 |

Pt4

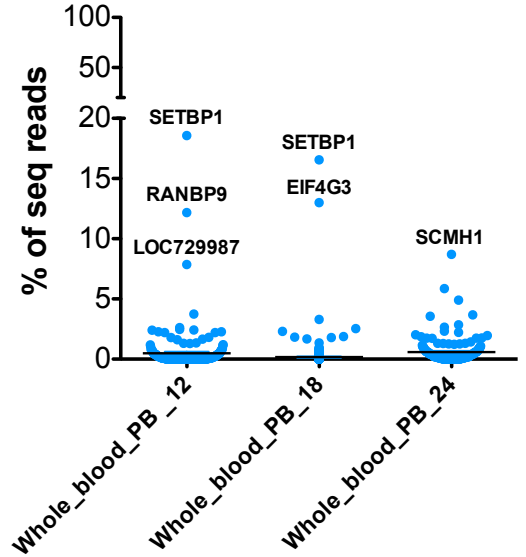



Figure S4

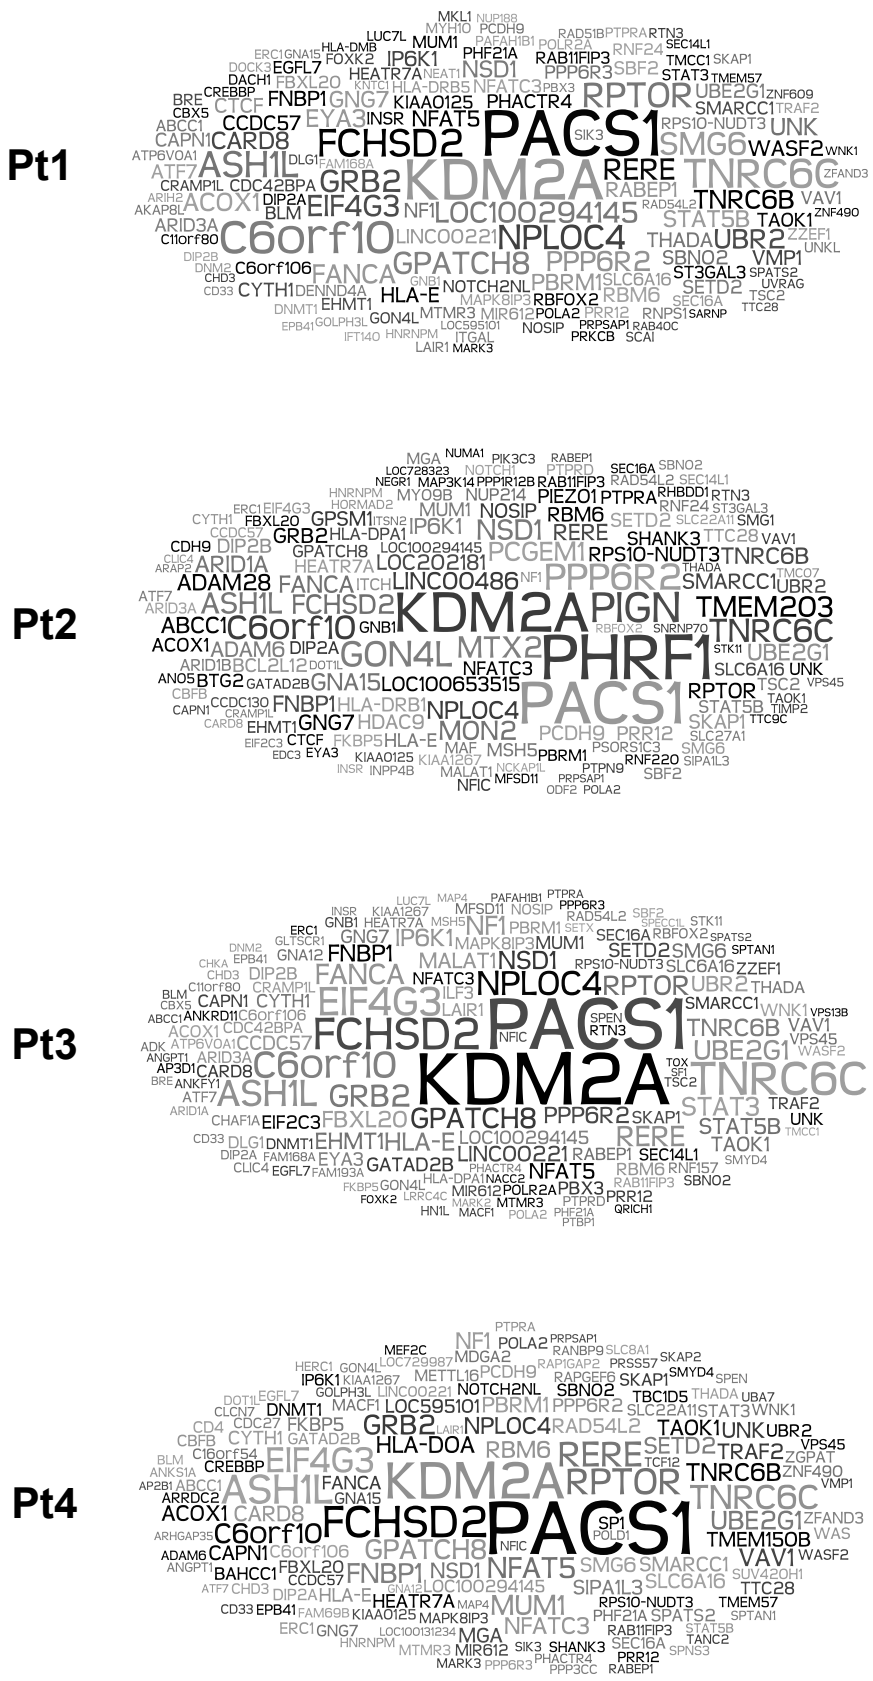

Table S1

| <i>IS from CFCs</i> | <i>shared only with Myeloid cells</i> | <i>shared only with Lymphoid cells</i> | <i>bipotent</i> | <i>not shared</i> |
|---------------------|---------------------------------------|----------------------------------------|-----------------|-------------------|
| <i>Pt1_36mo</i>     | 13.0                                  | 8.7                                    | 23.9            | 54.3              |
| <i>Pt2_24mo</i>     | 28.0                                  | 12.0                                   | 16.0            | 44.0              |
| <i>Pt3_36mo</i>     | 14.4                                  | 1.8                                    | 55.0            | 28.8              |
| <i>Pt4_24mo</i>     | 14.3                                  | 7.1                                    | 53.6            | 25.0              |

## Supplementary Figures Legends

**Figure S1, related to Figure 1:** Diversity index of different lineages and samples from BM and PB samples purified over time (left panel). Average diversity index of myeloid cells (orange line), lymphoid B and T cells (blue line), and BM CD34+ cells (gray line) over time (right panel).

**Figure S2, related to Figure 1:** Heatmaps showing pairwise positive associations of IS similarities among different lineages over time (see supplementary material for details). Red color intensity is proportional to increasing similarities. Right brackets summarize the most represented timepoints over the two main branches deriving from unsupervised clustering.

**Figure S3, related to Figure 4:** Dot plots showing the relative abundance of sequence counts (as percentage on the total) of IS retrieved from whole blood samples at different timepoints after GT (e.g. whole blood isolated from PB at 12 months after GT is reported as Whole\_blood\_PB\_12). Number of IS and relative sequence counts are reported above for each sample/timepoint.

**Figure S4, related to Figure 4:** Word clouds showing the single closest gene to each integration site collected over the entire follow-up from the four WAS GT patients (top 150 hit genes). The size of the gene name is proportional to the number of IS detected in its proximity.

**Table S1, related to Figure 2:** Table showing the percentage of IS from CFC shared with only myeloid, only lymphoid and both myeloid and lymphoid lineages (bipotent) from the same timepoint (months after GT). The IS fractions detected only in CFC at each given time is labeled as “not shared”.

**Supplemental Data File 1:** Word file containing additional details of the technical procedures and protocols employed for the analyses shown in the main manuscript related to Figure 1-4 and to the experimental methods.
